# Supplementary material for: Rare-earth-free red-emitting K2Ge4O9:Mn4+phosphor excited by blue light for warm white LEDs
Source: Royal Society of Chemistry journal article supplement (doi:10.1039/c6cp00168h), 2016-01-01
Supplement: c6cp00168h1.pdf [file c6cp00168h1.pdf]

**Table S1 Comparison of Mn<sup>4+</sup>-doped phosphors**

| Phosphor                                                                            | Emission wavelength | Excitation wavelength               | TQ (150 °C) compared with 25 °C |
|-------------------------------------------------------------------------------------|---------------------|-------------------------------------|---------------------------------|
| KGO: Mn <sup>4+</sup>                                                               | ~663 nm             | UV (325 nm) and Blue (463 nm)       | 10%                             |
| Ca <sub>14</sub> Al <sub>10</sub> Zn <sub>6</sub> O <sub>35</sub> :Mn <sup>4+</sup> | ~708 nm             | UV (318 nm) and Blue (462 nm, weak) | 88%                             |
| CaMg <sub>2</sub> Al <sub>16</sub> O <sub>27</sub> :Mn <sup>4+</sup>                | ~655 nm             | UV (345 nm) and Blue (468 nm, weak) | 73%                             |
| Sr <sub>4</sub> Al <sub>14</sub> O <sub>25</sub> : Mn <sup>4+</sup>                 | ~650 nm             | UV (300 nm) and Blue (470 nm, weak) | 50%                             |
| K <sub>2</sub> TiF <sub>6</sub> :Mn <sup>4+</sup>                                   | ~650 nm             | UV (362 nm) and Blue (468 nm)       | 98%                             |
| Mg <sub>2</sub> TiO <sub>4</sub> :Mn <sup>4+</sup>                                  | ~660 nm             | UV (350 nm) and Blue (460 nm, weak) | 30%                             |
| Mg <sub>14</sub> Ge <sub>5</sub> O <sub>24</sub> : Mn <sup>4+</sup>                 | ~659 nm             | UV (325 nm) and Blue (419 nm)       | 86%                             |
